# Supplementary material for: Cdon suppresses vascular smooth muscle calcification via repression of the Wnt/Runx2 Axis
Source: PubMed Central journal article supplement (PMC9898282; doi:10.1038/s12276-022-00909-7), 2023-01-06
Supplement: 12276_2022_909_MOESM1_ESM.pdf [file 12276_2022_909_MOESM1_ESM.pdf]

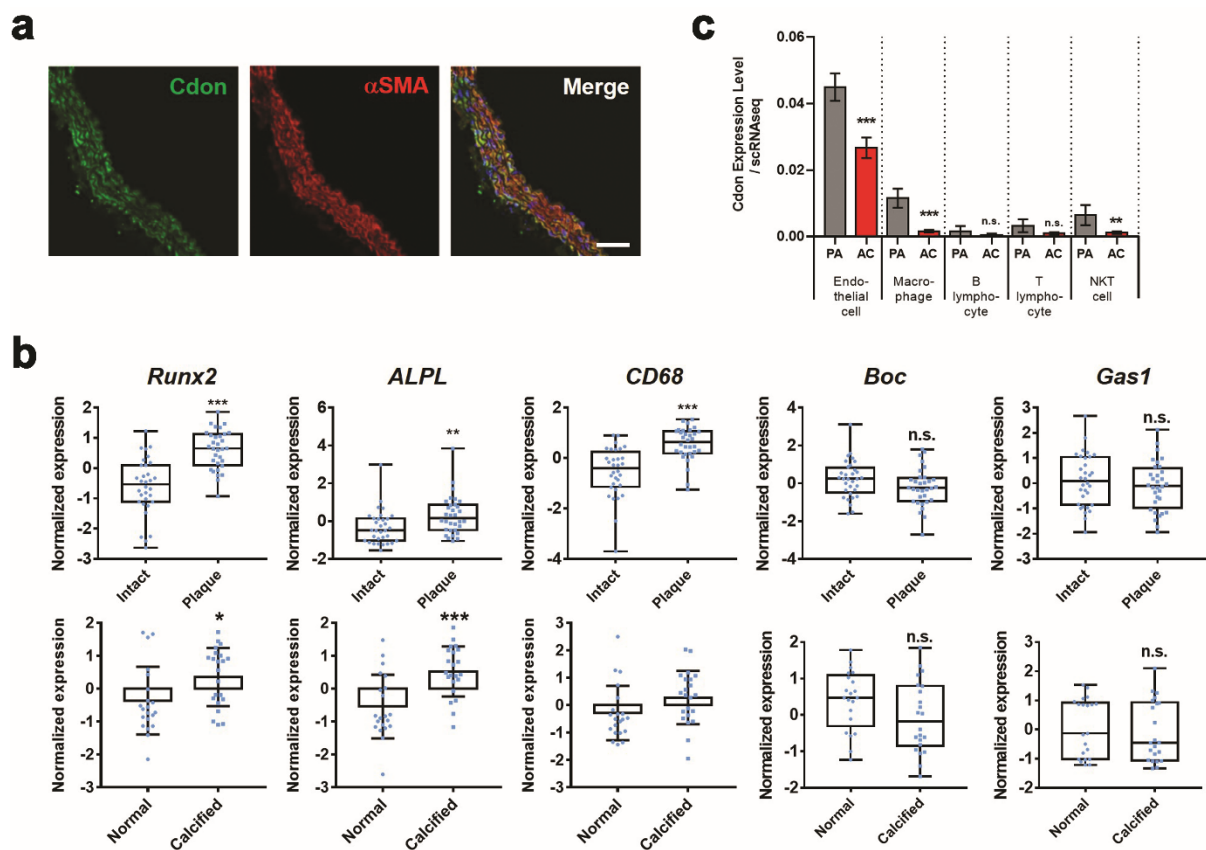

**Supplementary Fig 1.** The expression pattern of osteogenic markers, a foam cell marker and Sonic Hedgehog signaling coreceptors in atherosclerotic and calcified aortas.

**(a)** Representative immunostaining images of Cdon and  $\alpha$ SMA in mouse aorta. Scale bar: 100 $\mu$ m. **(b)** Scatterplots showing the expression of *Runx2*, *ALPL*, *CD68*, *Boc* and *Gas1* in aortic samples from patients with atherosclerotic plaques (GSE43292, n=32) and calcified aortas (GSE12644 and GSE83453, n=22). Statistical significance is determined with two-tailed Student's t-test. n.s.=not significant. **(c)** *Cdon* expression in endothelial cells, macrophages, B-lymphocytes, T-lymphocytes, and NKT cells of calcified atherosclerotic core plaques (AC) and patient-matched proximal adjacent portions (PA) of carotid artery (GSE159677, n=3). Statistical significance is determined with two-tailed Student's t-test. \* $P$ <0.05, \*\* $P$ <0.01, \*\*\* $P$ <0.005, n.s.=not significant.

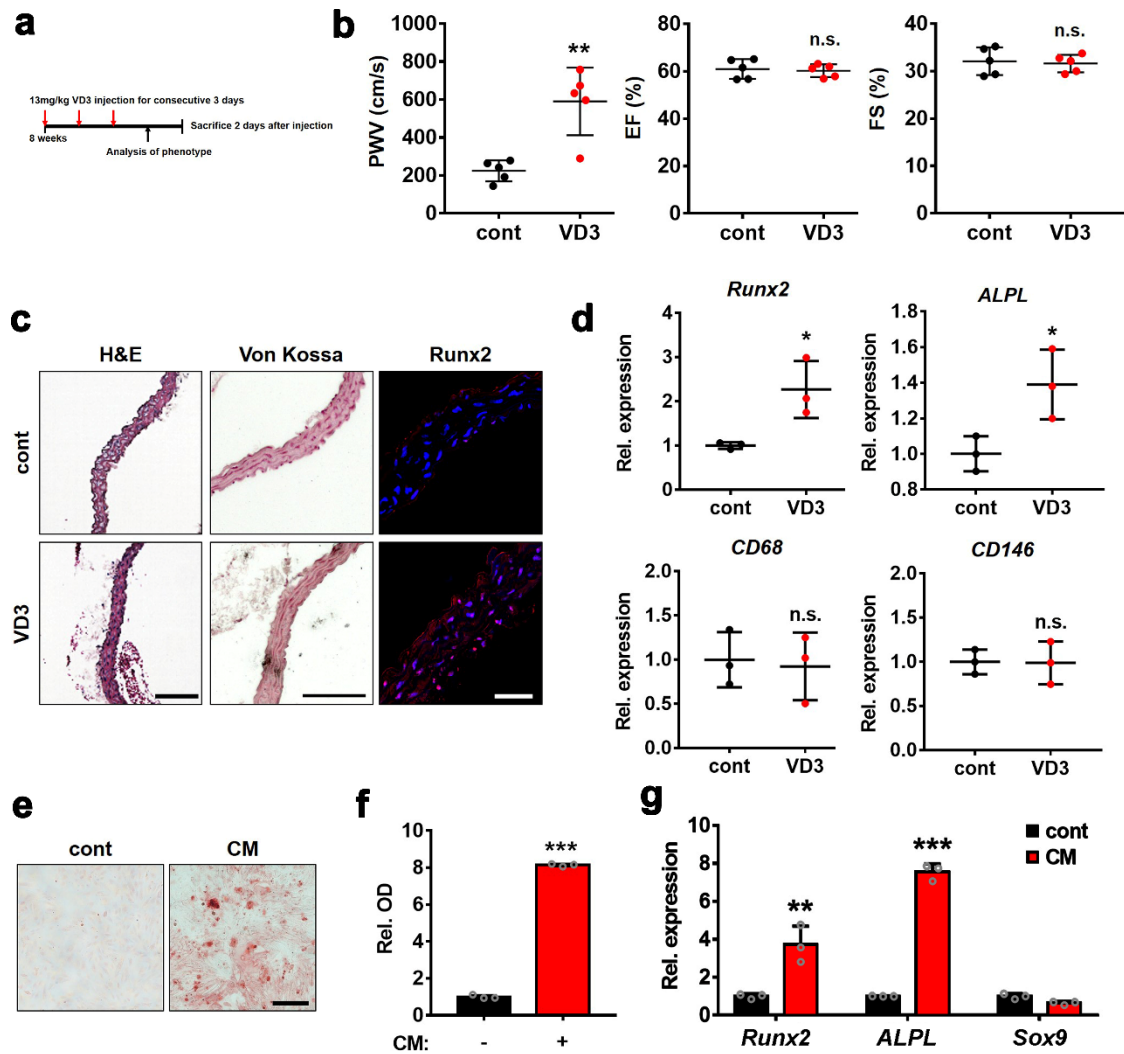

**Supplementary Fig 2.** Analysis of *in vivo* and *in vitro* vascular calcification models.

(a) The experimental scheme for inducing vascular calcification in mice. 8-week-old mice were administrated subcutaneously with VD3 for consecutive 3 days. (b) Echocardiographic parameters of VD3 injected mice for analyzing aortic stiffness and cardiac function (n=5): the pulse wave velocity (PWV), the ejection fraction (EF), and the fractional shortening (FS). Data represent means  $\pm$ SEM analyzed by Student's t-test. n.s.=not significant, \*\* $P$ <0.01. (c) Representative images for histological staining and immunostaining. Scale bar: 100 $\mu$ m (Left), 200 $\mu$ m (Middle) and 50 $\mu$ m (Right). (d) Relative transcript levels of osteogenic and foam cell markers in aortas treated with VD3 (n=3). Data represent means  $\pm$ SEM analyzed by Student's t-test. \* $P$ <0.05. (e) Alizarin red staining images of VSMCs treated with control or CM. Scale bar: 100 $\mu$ m. (f) Quantification of Alizarin Red staining shown in panel e. (n=3). Data represent means  $\pm$ SEM analyzed by Student's t-test. \*\*\* $P$ <0.005. (g) Relative transcript levels of osteogenic markers in VSMCs treated with CM. (n=3). Data represent means  $\pm$ SEM analyzed by Student's t-test. \*\* $P$ <0.01, \*\*\* $P$ <0.005.

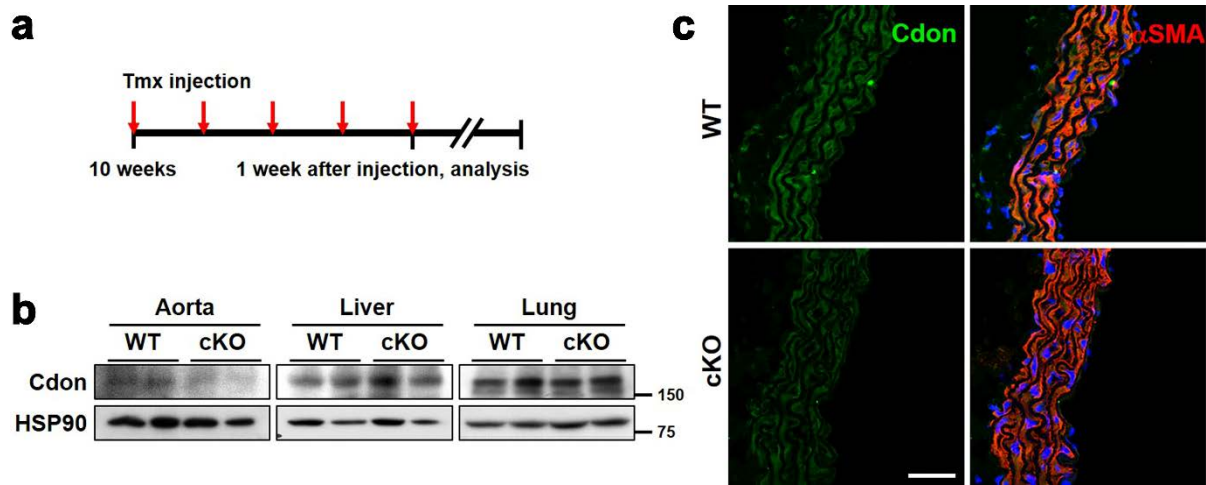

**Supplementary Fig 3.** Generation of mice ablated Cdon in VSMCs.

(a) To ablate Cdon in smooth muscles, *Cdon*<sup>ff;Sm22 $\alpha$ -CreERT2</sup> mice (cKO) were administrated intraperitoneally with tmx as indicated. (b) Immunoblot analysis for Cdon expression in aorta, liver and lung from WT and cKO mice. (c) Immunostaining for Cdon and  $\alpha$ SMA in aortas. Scale bar: 40 $\mu$ m.

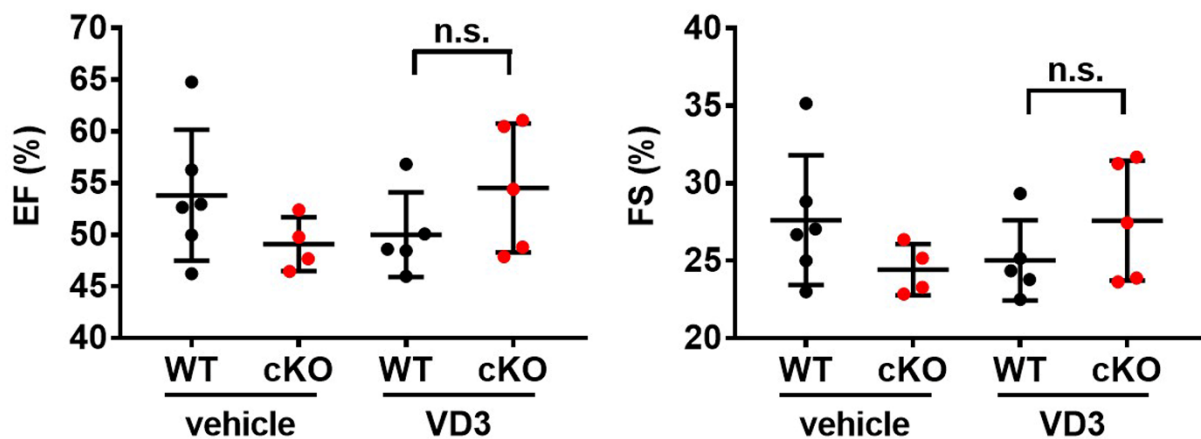

**Supplementary Fig 4.** Cardiac function is unaffected in cKO mice.

Echocardiographic parameters in WT and cKO mice treated with vehicle or VD3: the ejection fraction (EF) and the fractional shortening (FS) (n=5). Data represent means  $\pm$ SEM analyzed by one-way ANOVA test. n.s.=not significant.

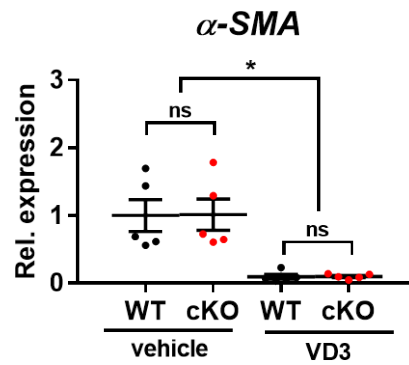

**Supplementary Fig 5. Cdon deficiency does not influence on  $\alpha$ -SMA expression.**

Relative RNA expression of  $\alpha$ -SMA in vehicle- or VD3-treated WT or cKO aortas (n=3). Data represent means  $\pm$ SEM analyzed by one-way ANOVA test. \* $P$ <0.05, n.s.=not significant.

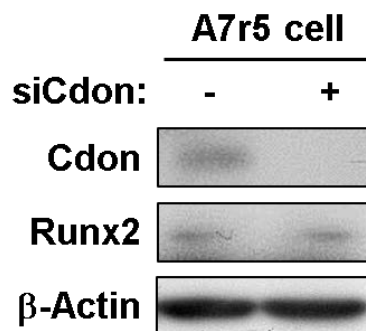

**Supplementary Fig 6. Cdon deficiency without viral infection-induced stress does not induce calcification under the normal condition.**

A7r5 VSMCs were transfected with siCdon, which targets the same sequence as shCdon and cultured under the normal cell culture condition. Western blot was performed with anti-Cdon or anti-Runx2 antibody.  $\beta$ -Actin was selected as a loading control.

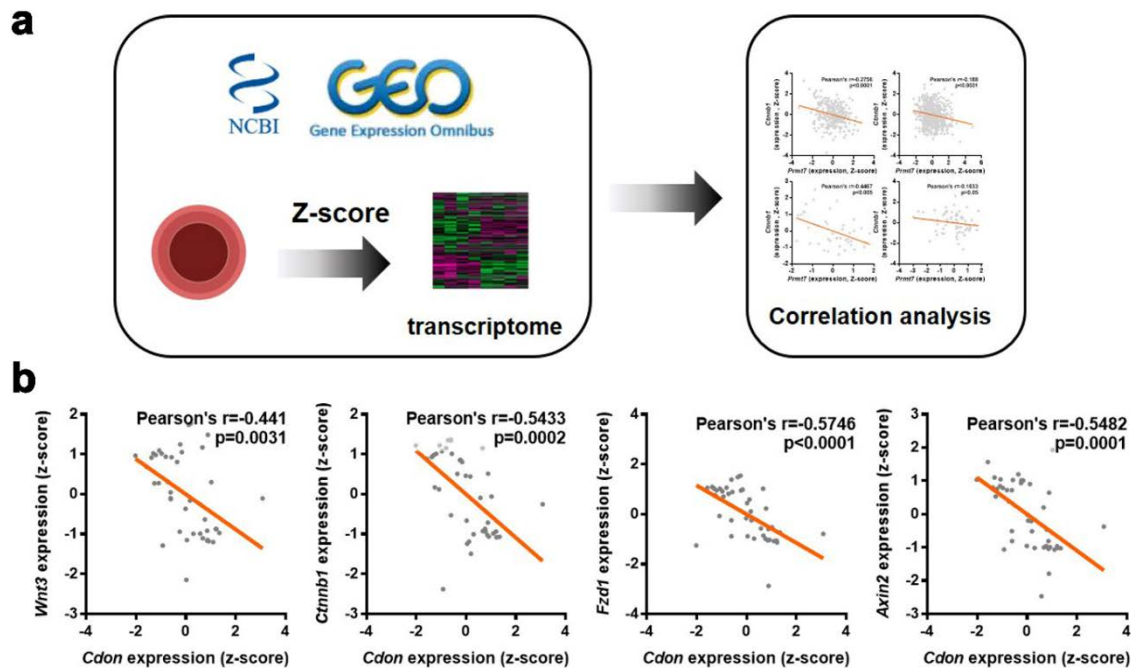

**Supplementary Fig 7.** The negative correlation between *Cdon* and Wnt signaling genes in aorta.

(a) The scheme of stepwise workflow of an aortic transcriptome analysis: collect the gene expression profile for aortas, normalize the value of gene expression to Z-score, and analyze the correlation between *Cdon* and potential target genes. (b) The scatter plots presenting the correlated expression patterns between *Cdon* (X-axis) and Wnt signaling genes like *Wnt3*, *Ctnnb1*, *Fzd1*, and *Axin2* (Y-axis).

**Supplementary Table 1.** The primary antibodies used in this study

| Antigen          | Host | Cat. No. | Manufacturer              |
|------------------|------|----------|---------------------------|
| $\alpha$ -SMA    | R    | Ab5694   | Abcam                     |
| $\beta$ -Actin   | R    | #4970    | Cell signaling technology |
| $\beta$ -Catenin | M    | Sc7963   | Santa Cruz                |
| <i>Cdon</i>      | G    | AF2429   | R&D systems               |
| HSP90            | R    | Sc-7947  | Snta Cruz                 |
| <i>Runx2</i>     | M    | D130-3   | MBL                       |

**Supplementary Table 2.** The primer sequence for quantitative RT-PCR

| <b>Gene symbol</b>            |         | <b>5' to 3'</b>                |
|-------------------------------|---------|--------------------------------|
| <b>ALPL</b>                   | Forward | 5'-CAAGGACATCGCATATCAGCTAA-3'  |
|                               | Reverse | 5'-CAGTTCTGTTCTTCGGGTACATGT-3' |
| <b>Axin2</b>                  | Forward | 5'-AGTGAGACGCTCTCCCTCACCA-3'   |
|                               | Reverse | 5'-GAAACGCGCATAGGTTTGCTGGAC-3' |
| <b>Caprin2</b>                | Forward | 5'-GGCAGCCGGGGAGTCAC-3'        |
|                               | Reverse | 5'-GCTTCCAACCTGGTCTGGGT-3'     |
| <b>Cdk1</b>                   | Forward | 5'-ATTGTGTTTTTGCCACTCCCG-3'    |
|                               | Reverse | 5'-ACAGCGTCACTACCTCGTGT-3'     |
| <b>Cdon</b>                   | Forward | 5'-CTGCACACACAACTCCCTG-3'      |
|                               | Reverse | 5'-TTGGTTTTGGTGAAACACCTATTG-3' |
| <b>CD68</b>                   | Forward | 5'-CTTCCCACAGGCAGCACAG-3'      |
|                               | Reverse | 5'-CTTCCCACAGGCAGCACAG-3'      |
| <b>CD146</b>                  | Forward | 5'-CGGGTGTGCCAGGAGAG-3'        |
|                               | Reverse | 5'-GGCGGTGCTCATATTCACCA-3'     |
| <b>Ets1</b>                   | Forward | 5'-AGAGCCAGTCGTGGTAAACTC-3'    |
|                               | Reverse | 5'-TGAAGGATGACTGGCTGCTC-3'     |
| <b>Gapdh</b>                  | Forward | 5'-GACATGCCGCCTGGAGAAAC-3'     |
|                               | Reverse | 5'-AGCCCAGGATGCCCTTTAGT-3'     |
| <b>Runx2</b>                  | Forward | 5'-CACCGACAGTCCCAACTTCCT-3'    |
|                               | Reverse | 5'-ACGGTAACCACAGTCCCATCTG-3'   |
| <b>p16</b>                    | Forward | 5'-CCCAACGCCCCGAAC-3'          |
|                               | Reverse | 5'-GCAGAAGAGCTGCTACGTGAA-3'    |
| <b>p21</b>                    | Forward | 5'-GTCAGGCTGGTCTGCCTCCG-3'     |
|                               | Reverse | 5'-CGGTCCCGTGGACAGTGAGCAG-3'   |
| <b>Wif1</b>                   | Forward | 5'-CCCGATGTATGAACGGTGGT-3'     |
|                               | Reverse | 5'-GGTGGTTGAGCAGTTTGCTTT-3'    |
| <b>Wnt9a</b>                  | Forward | 5'-GGCCCAAGCACACTACAAG-3'      |
|                               | Reverse | 5'-AGAAGAGATGGCGTAGAGGAAA-3'   |
| <b><math>\alpha</math>SMA</b> | Forward | 5'-CTGACAGAGGCACCACTGAA-3'     |
|                               | Reverse | 5'-CATCTCCAGAGTCCAGCACA-3'     |
